# Supplementary material for: Significance of the Diversification of Wheat Species for the Assembly and Functioning of the Root-Associated Microbiome
Source: PubMed Central journal article supplement (PMC8764353; doi:10.3389/fmicb.2021.782135), 2022-01-04
Supplement: Presentation_1.pdf [file Presentation_1.pdf]

## SUPPLEMENTARY DATA

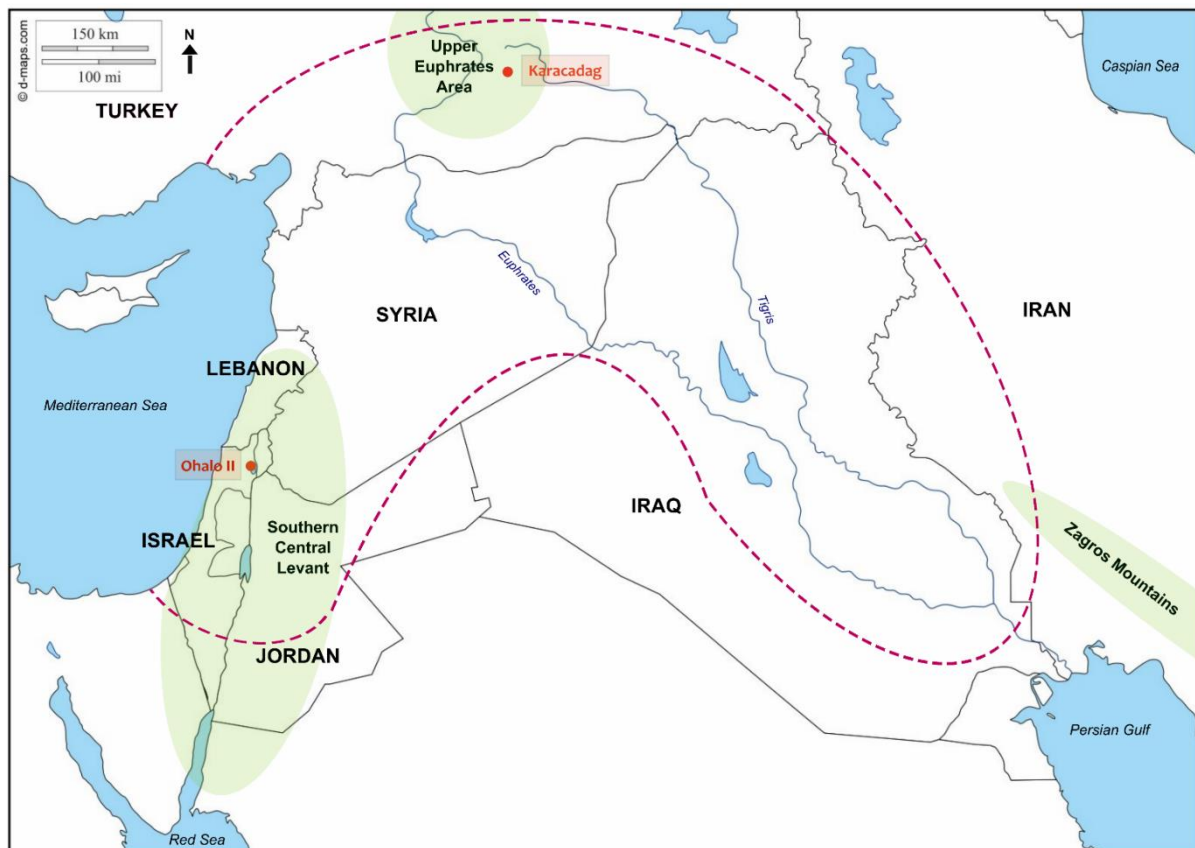

**Figure S1. Map of the Fertile Crescent, where wheat domestication took place.** The Fertile Crescent is marked by the dashed purple line. Archeobotanical evidence (dated from 10 000 to 12 000 years BP) of cultivated wild cereals were found in the Southern Central Levant, the Upper Euphrates Area and the Zagros Mountains. Karacadag and Ohalo II correspond to key archeological sites where ancient agricultural practices have been evidenced. The northern part of the Fertile Crescent, in Southeast Turkey (which includes the Upper Euphrates Area), is where the earliest domestication events of wild cereals probably took place, 10 500 to 11 000 years BP. Adapted from Salamini *et al.* [27].

## Supplementary data 1. List of references cited in Tables 4, S1 and S2

- Achouak, W., Abrouk, D., Guyonnet, J., Barakat, M., Ortet, P., Simon, L., Lerondelle, C., Heulin, T., and Haichar, F. Z. (2019). Plant hosts control microbial denitrification activity. *FEMS Microbiol. Ecol.* 95:fiz021.
- Almario, J., Moëgne-Loccoz, Y., and Muller, D. (2013). Monitoring of the relation between 2,4-diacetylphloroglucinol-producing *Pseudomonas* and *Thielaviopsis basicola* populations by real-time PCR in tobacco black root-rot suppressive and conducive soils. *Soil Biol. Biochem.* 57:144–155.
- Bai, L., Cui, J., Jie, W., and Cai, B. (2015). Analysis of the community compositions of rhizosphere fungi in soybeans continuous cropping fields. *Microbiol. Res.* 180:49–56.
- Bergkemper, F., Kublik, S., Lang, F., Krüger, J., Vestergaard, G., Schloter, M., and Schulz, S. (2016). Novel oligonucleotide primers reveal a high diversity of microbes which drive phosphorous turnover in soil. *J. Microbiol. Meth.* 125:91–97.
- Bokati, D., Herrera, J., and Poudel, R. (2016). Soil Influences colonization of root-associated fungal endophyte communities of maize, wheat, and their progenitors. *J. Mycol.* 2016:1–9.
- Bouffaud, M.-L., Renoud, S., Moëgne-Loccoz, Y., and Muller, D. (2016). Is plant evolutionary history impacting recruitment of diazotrophs and *nifH* expression in the rhizosphere? *Sci. Rep.* 6:1–9.
- Bouffaud, M.-L., Renoud, S., Dubost, A., Moëgne-Loccoz, Y., and Muller, D. (2018). 1-Aminocyclopropane-1-carboxylate deaminase producers associated to maize and other *Poaceae* species. *Microbiome* 6:114.
- Brisson, V. L., Schmidt, J. E., Northen, T. R., Vogel, J. P., and Gaudin, A. C. M. (2019). Impacts of maize domestication and breeding on rhizosphere microbial community recruitment from a nutrient depleted agricultural soil. *Sci. Rep.* 9:15611.
- Bulgarelli, D., Garrido-Oter, R., Münch, P. C., Weiman, A., Dröge, J., Pan, Y., McHardy, A., and Schulze-Lefert, P. (2015). Structure and function of the bacterial root microbiota in wild and domesticated barley. *Cell Host Microbe* 17:392–403.
- Bürgmann, H., Widmer, F., Sigler, W. V., and Zeyer, J. (2003). mRNA extraction and reverse transcription-PCR protocol for detection of *nifH* gene expression by *Azotobacter vinelandii* in soil. *Appl. Environ. Microbiol.* 69:1928–1935.
- Chaparro, J. M., Badri, D. V., and Vivanco, J. M. (2014). Rhizosphere microbiome assemblage is affected by plant development. *ISME J.* 8:790–803.
- Chen, X., Jiang, N., Chen, Z., Tian, J., Sun, N., Xu, M., and Chen, L. (2017). Response of soil *phoD* phosphatase gene to long-term combined applications of chemical fertilizers and organic materials. *Appl. Soil Ecol.* 119:197–204.
- DeCoste, N. J., Gadkar, V. J., and Filion, M. (2011). Relative and absolute quantitative real-time PCR-based quantifications of *hcnC* and *phlD* gene transcripts in natural soil spiked with *Pseudomonas* sp. strain LBUM300. *Appl. Environ. Microbiol.* 77:41–47.

- Dennert, F., Imperiali, N., Staub, C., Schneider, J., Laessle, T., Zhang, T., Wittwer, R., van der Heijden, M. Smits, T., Schlaeppi, K., Keel, C., and Maurhofer, M. (2018). Conservation tillage and organic farming induce minor variations in *Pseudomonas* abundance, their antimicrobial function and soil disease resistance. *FEMS Microbiol. Ecol.* 94:fiy075.
- Edwards, J., Johnson, C., Santos-Medellín, C., Lurie, E., Podishetty, N. K., Bhatnagar, S., et al. (2015). Structure, variation, and assembly of the root-associated microbiomes of rice. *Proc. Natl. Acad. Sci. USA* 112:911–920.
- Fan, K., Weisenhorn, P., Gilbert, J. A., and Chu, H. (2018). Wheat rhizosphere harbors a less complex and more stable microbial co-occurrence pattern than bulk soil. *Soil Biol. Biochem.* 125:251–260.
- Gadkar, V. J., and Filion, M. (2013). Development of a versatile TaqMan™ real-time quantitative PCR (RT-qPCR) compliant anchor sequence to quantify bacterial gene transcripts from RNA samples containing carryover genomic DNA. *BMC Biotechnol.* 13:1-11.
- Gill, S., Abid, M., and Azam, F. (2006). Root-induced changes in potential nitrification and nitrate reductase activity of the rhizospheric soil of wheat (*Triticum aestivum* L) and chickpea (*Cicer arietinum* L.) *Pak. J Bot.* 38:991.
- Gqozo, M. P., Bill, M., Siyoum, N., Labuschagne, N., and Korsten, L. (2020). Fungal diversity and community composition of wheat rhizosphere and non-rhizosphere soils from three different agricultural production regions of South Africa. *Appl. Soil Ecol.* 151:103543.
- Gu, Y.-H., and Mazzola, M. (2003). Modification of fluorescent pseudomonad community and control of apple replant disease induced in a wheat cultivar-specific manner. *Appl. Soil Ecol.* 24:57-72.
- Han, Y., Xu, L., Liu, L., Yi, M., Guo, E., Zhang, A., et al. (2017). Illumina sequencing reveals a rhizosphere bacterial community associated with foxtail millet smut disease suppression. *Plant Soil* 410: 411–421.
- Henry, S., Baudoin, E., López-Gutiérrez, J. C., Martin-Laurent, F., Brauman, A., and Philippot, L. (2004). Quantification of denitrifying bacteria in soils by *nirK* gene targeted real-time PCR. *J. Microbiol. Meth.* 59:327–335.
- Henry, S., Bru, D., Stres, B., Hallet, S., and Philippot, L. (2006). Quantitative detection of the *nosZ* gene, encoding nitrous oxide reductase, and comparison of the abundances of 16S rRNA, *narG*, *nirK*, and *nosZ* genes in soils. *Appl. Environ. Microbiol.* 72:5181–5189.
- Hu, J., Wei, Z., Friman, V.-P., Gu, S., Wang, X., Eisenhauer, N., et al. (2016). Probiotic diversity enhances rhizosphere microbiome function and plant disease suppression. *mBio* 7:e01790-16.
- Imperiali, N., Dennert, F., Schneider, J., Laessle, T., Velatta, C., Fesselet, M., et al. (2017). Relationships between root pathogen resistance, abundance and expression of *Pseudomonas* antimicrobial genes, and soil properties in representative swiss agricultural soils. *Front. Plant Sci.* 8:427.
- Kazerooni, E. A., Maharachchikumbura, S. S. N., Rethinasamy, V., Al-Mahrouqi, H., and Al-Sadi, A. M. (2017). Fungal diversity in tomato rhizosphere soil under conventional and desert farming systems. *Front. Microbiol.* 8:1462.
- Kwak, M.-J., Kong, H. G., Choi, K., Kwon, S.-K., Song, J. Y., Lee, J., et al. (2018). Rhizosphere microbiome structure alters to enable wilt resistance in tomato. *Nat. Biotechnol.* 36:1100–1109.

Lee, S. A., Kim, Y., Kim, J. M., Chu, B., Joa, J.-H., Sang, M. K., et al. (2019). A preliminary examination of bacterial, archaeal, and fungal communities inhabiting different rhizocompartments of tomato plants under real-world environments. *Sci. Rep.* 9:1–15.

Leininger, S., Urich, T., Schloter, M., Schwark, L., Qi, J., Nicol, G. W., et al. (2006). *Archaea* predominate among ammonia-oxidizing prokaryotes in soils. *Nature* 442:806–809.

Li, X. (2017). Microbial activity and community diversity in tobacco rhizospheric soil affected by different pre-crops. *Appl. Ecol. Environ. Res.* 15:15–30.

Li, Y., Wang, L., Yang, L., and Li, H. (2014). Dynamics of rhizosphere properties and antioxidative responses in wheat (*Triticum aestivum* L.) under cadmium stress. *Ecotox. Environ. Safe.* 102:55–61.

Liu, F., Hewezi, T., Lebeis, S. L., Pantalone, V., Grewal, P. S., and Staton, M. E. (2019). Soil indigenous microbiome and plant genotypes cooperatively modify soybean rhizosphere microbiome assembly. *BMC Microbiol.* 19:201.

Long, X.-E., Yao, H., Huang, Y., Wei, W., and Zhu, Y.-G. (2018). Phosphate levels influence the utilisation of rice rhizodeposition carbon and the phosphate-solubilising microbial community in a paddy soil. *Soil Biol. Biochem.* 118:103–114.

Lu, T., Ke, M., Peijnenburg, W. J. G. M., Zhu, Y., Zhang, M., Sun, L., et al. (2018). Investigation of rhizospheric microbial communities in wheat, barley, and two rice varieties at the seedling stage. *J. Agric. Food Chem.* 66:2645–2653.

Lundberg, D. S., Lebeis, S. L., Paredes, S. H., Yourstone, S., Gehring, J., Malfatti, S., et al. (2012). Defining the core *Arabidopsis thaliana* root microbiome. *Nature* 488:86–90.

Mahmoudi, T. R., Yu, J. M., Liu, S., Pierson, L. S., and Pierson, E. A. (2019). Drought-stress tolerance in wheat seedlings conferred by phenazine-producing rhizobacteria. *Front. Microbiol.* 10:1590.

Mahoney, A. K., Yin, C., and Hulbert, S. H. (2017). Community structure, species variation, and potential functions of rhizosphere-associated bacteria of different winter wheat (*Triticum aestivum*) cultivars. *Front. Plant Sci.* 8:132.

Maketon, C., Fortuna, A.-M., and Okubara, P. A. (2012). Cultivar-dependent transcript accumulation in wheat roots colonized by *Pseudomonas fluorescens* Q8r1-96 wild type and mutant strains. *Biol. Control* 60:216–224.

Mazzola, M., and Gu, Y.-H. (2002). Wheat genotype-specific induction of soil microbial communities suppressive to disease incited by *Rhizoctonia solani* anastomosis group (AG)-5 and AG-8. *Phytopathology* 92:1300–1307.

Mazzola, M., Funnell, D. L., and Raaijmakers, J. M. (2004). Wheat cultivar-specific selection of 2,4-diacetylphloroglucinol-producing fluorescent *Pseudomonas* species from resident soil populations. *Microb. Ecol.* 48:338–348.

Meyer, J. B., Lutz, M. P., Frapolli, M., Péchy-Tarr, M., Rochat, L., Keel, C., et al. (2010). Interplay between wheat cultivars, biocontrol pseudomonads, and soil. *Appl. Environ. Microbiol.* 76:6196–6204.

Narula, N., Kumar, V., Behl, R. K., Deubel, A., Gransee, A., and Merbach, W. (2000). Effect of P-solubilizing *Azotobacter chroococcum* on N, P, K uptake in P-responsive wheat genotypes grown under greenhouse conditions. *J. Plant Nutr. Soil Sci.* 163:393–398.

- Naylor, D., DeGraaf, S., Purdom, E., and Coleman-Derr, D. (2017). Drought and host selection influence bacterial community dynamics in the grass root microbiome. *ISME J.* 11:2691–2704.
- Ndour, P., Gueye, M., Barakat, M., Ortet, P., Bertrand-Huleux, M., Pablo, A., et al. (2017). Pearl millet genetic traits shape rhizobacterial diversity and modulate rhizosphere aggregation. *Front. Plant Sci.* 8:1288.
- Nelson, D., Cann, I., and Mackie, R. (2010). Response of archaeal communities in the rhizosphere of maize and soybean to elevated atmospheric CO<sub>2</sub> concentrations. *PLoS One* 5:e15897.
- Novinscak, A., and Fillion, M. (2011). Effect of soil clay content on RNA isolation and on detection and quantification of bacterial gene transcripts in soil by quantitative reverse transcription-PCR. *Appl. Environ. Microbiol.* 77:6249–6252.
- Offre, P., Prosser, J. I., and Nicol, G. W. (2009). Growth of ammonia-oxidizing *Archaea* in soil microcosms is inhibited by acetylene. *FEMS Microbiol. Ecol.* 70:99–108.
- Okubara, P. A., and Bonsall, R. F. (2008). Accumulation of *Pseudomonas*-derived 2,4-diacetylphloroglucinol on wheat seedling roots is influenced by host cultivar. *Biol. Control* 46:322–331.
- Pagnani, G., Galieni, A., Stagnari, F., Pellegrini, M., Del Gallo, M., and Pisante, M. (2020). Open field inoculation with PGPR as a strategy to manage fertilization of ancient *Triticum* genotypes. *Biol. Fertil. Soils* 56:111–124.
- Paulin, M. M., Novinscak, A., St-Arnaud, M., Goyer, C., DeCoste, N. J., Privé, J.-P., et al. (2009). Transcriptional activity of antifungal metabolite-encoding genes *phlD* and *hcnBC* in *Pseudomonas* spp. using qRT-PCR. *FEMS Microbiol. Ecol.* 68:212–222.
- Peiffer, J. A., Spor, A., Koren, O., Jin, Z., Tringe, S. G., Dangl, J. L., et al. (2013). Diversity and heritability of the maize rhizosphere microbiome under field conditions. *Proc. Natl. Acad. Sci. USA* 110:6548–6553.
- Pérez-de-Luque, A., Tille, S., Johnson, I., Pascual-Pardo, D., Ton, J., and Cameron, D. D. (2017). The interactive effects of arbuscular mycorrhiza and plant growth-promoting rhizobacteria synergistically enhance host plant defences against pathogens. *Sci. Rep.* 7:16409.
- Pérez-Jaramillo, J. E., Carrión, V. J., Bosse, M., Ferrão, L. F. V., de Hollander, M., Garcia, A. A. F., et al. (2017). Linking rhizosphere microbiome composition of wild and domesticated *Phaseolus vulgaris* to genotypic and root phenotypic traits. *ISME J.* 11:2244–2257.
- Poly, F., Ranjard, L., Nazaret, S., Gourbiere, F., and Jocteur Monrozier, L. (2001). Comparison of *nifH* gene pools in soils and soil microenvironments with contrasting properties. *Appl. Environ. Microbiol.* 67:2255–2262.
- Prudence, S. M. M., Newitt, J. T., Worsley, S. F., Macey, M. C., Murrell, J. C., Lehtovirta-Morley, L. E., et al. (2021). Soil, senescence and exudate utilisation: characterisation of the Paragon var. spring bread wheat root microbiome. *Environ. Microbiome* 16:12.
- Ragot, S. A., Kertesz, M. A., and Bünemann, E. K. (2015). *phoD* alkaline phosphatase gene diversity in soil. *Appl. Environ. Microbiol.* 81:7281–7289.
- Rascovan, N., Carbonetto, B., Perrig, D., Díaz, M., Canciani, W., Abalo, M., et al. (2016). Integrated analysis of root microbiomes of soybean and wheat from agricultural fields. *Sci. Rep.* 6:1–12.

- Renoud, S., Bouffaud, M.-L., Dubost, A., Prigent-Combaret, C., Legendre, L., Moënne-Loccoz, Y., et al. (2020). Co-occurrence of rhizobacteria with nitrogen fixation and/or 1-aminocyclopropane-1-carboxylate deamination abilities in the maize rhizosphere. *FEMS Microbiol. Ecol.* 96:fiaa062.
- Rilling, J. I., Acuña, J. J., Sadowsky, M. J., and Jorquera, M. A. (2018). Putative nitrogen-fixing bacteria associated with the rhizosphere and root endosphere of wheat plants grown in an andisol from southern Chile. *Front. Microbiol.* 9:2710.
- Rotthauwe, J. H., Witzel, K. P., and Liesack, W. (1997). The ammonia monooxygenase structural gene *amoA* as a functional marker: molecular fine-scale analysis of natural ammonia-oxidizing populations. *Appl. Environ. Microbiol.* 63:4704–4712.
- Sakurai, M., Wasaki, J., Tomizawa, Y., Shinano, T., and Osaki, M. (2008). Analysis of bacterial communities on alkaline phosphatase genes in soil supplied with organic matter. *Soil Sci. Plant Nutr.* 54:62–71.
- Santhanam, R., Groten, K., Meldau, D. G., and Baldwin, I. T. (2014). Analysis of plant-bacteria interactions in their native habitat: bacterial communities associated with wild tobacco are independent of endogenous jasmonic acid levels and developmental stages. *PLoS One* 9:e94710.
- Santos-Medellín, C., Edwards, J., Liechty, Z., Nguyen, B., and Sundaresan, V. (2017). Drought stress results in a compartment-specific restructuring of the rice root-associated microbiomes. *mBio* 8:e00764-17.
- Siciliano, S. D., Theoret, C. M., de Freitas, J. R., Hucl, P. J., and Germida, J. J. (1998). Differences in the microbial communities associated with the roots of different cultivars of canola and wheat. *Can. J. Microbiol.* 44:844–851.
- Soni, R., Suyal, D. C., Sai, S., and Goel, R. (2016). Exploration of *nifH* gene through soil metagenomes of the western Indian Himalayas. *3 Biotech.* 6:25.
- Spohn, M., Zavišić, A., Nassal, P., Bergkemper, F., Schulz, S., Marhan, S., et al. (2018). Temporal variations of phosphorus uptake by soil microbial biomass and young beech trees in two forest soils with contrasting phosphorus stocks. *Soil Biol. Biochem.* 117:191–202.
- Spor, A., Roucou, A., Mounier, A., Bru, D., Breuil, M.-C., Fort, F., et al. (2020). Domestication-driven changes in plant traits associated with changes in the assembly of the rhizosphere microbiota in tetraploid wheat. *Sci. Rep.* 10:12234.
- Stopnisek, N., and Shade, A. (2021). Persistent microbiome members in the common bean rhizosphere: an integrated analysis of space, time, and plant genotype. *ISME J.* 15:2708–2722.
- Stromberger, M. E., Abdulafef, I., Byrne, P., Canela, M. M., Elamari, A. A., Manter, D. K., et al. (2017). Genotype-specific enrichment of 1-aminocyclopropane-1-carboxylic acid deaminase-positive bacteria in winter wheat rhizospheres. *Soil Sci. Soc. Am. J.* 81:796–805.
- Sugiyama, A., Ueda, Y., Zushi, T., Takase, H., and Yazaki, K. (2014). Changes in the bacterial community of soybean rhizospheres during growth in the field. *PLoS One* 9:e100709.
- Svercel, M., Hamelin, J., Duffy, B., Moënne-Loccoz, Y., and Défago, G. (2010). Distribution of *Pseudomonas* populations harboring *phlD* or *hcnAB* biocontrol genes is related to depth in vineyard soils. *Soil Biol. Biochem.* 42:466–472.

- Throbäck, I. N., Enwall, K., Jarvis, Å., and Hallin, S. (2004). Reassessing PCR primers targeting *nirS*, *nirK* and *nosZ* genes for community surveys of denitrifying bacteria with DGGE. *FEMS Microbiol. Ecol.* 49:401–417.
- Tkacz, A., Pini, F., Turner, T. R., Bestion, E., Simmonds, J., Howell, P., et al. (2020). Agricultural selection of wheat has been shaped by plant-microbe interactions. *Front. Microbiol.* 11:132.
- Treusch, A. H., Leininger, S., Kletzin, A., Schuster, S. C., Klenk, H.-P., and Schleper, C. (2005). Novel genes for nitrite reductase and Amo-related proteins indicate a role of uncultivated mesophilic *Crenarchaeota* in nitrogen cycling. *Environ. Microbiol.* 7:1985–1995.
- Turner, T. R., Ramakrishnan, K., Walshaw, J., Heavens, D., Alston, M., Swarbreck, D., et al. (2013). Comparative metatranscriptomics reveals kingdom level changes in the rhizosphere microbiome of plants. *ISME J.* 7:2248–2258.
- Valente, J., Gerin, F., Gouis, J. L., Moënne-Loccoz, Y., and Prigent-Combaret, C. (2020). Ancient wheat varieties have a higher ability to interact with plant growth-promoting rhizobacteria. *Plant Cell Environ.* 43:246–260.
- Venieraki, A., Dimou, M., Pergalis, P., Kefalogianni, I., Chatzipavlidis, I., and Katinakis, P. (2011). The genetic diversity of culturable nitrogen-fixing bacteria in the rhizosphere of wheat. *Microb. Ecol.* 61:277–285.
- Wartiainen, I., Eriksson, T., Zheng, W., and Rasmussen, U. (2008). Variation in the active diazotrophic community in rice paddy—*nifH* PCR-DGGE analysis of rhizosphere and bulk soil. *Appl. Soil Ecol.* 39:65–75.
- Wu, L., Ma, K., and Lu, Y. (2009). Prevalence of betaproteobacterial sequences in *nifH* gene pools associated with roots of modern rice cultivars. *Microb. Ecol.* 57:58–68.
- Yang, L., Danzberger, J., Schöler, A., and Schröder, P. (2017). Dominant groups of potentially active bacteria shared by barley seeds become less abundant in root associated microbiome. *Front. Plant Sci.* 8:1005.
- Yang, M., Mavrodi, D. V., Thomashow, L. S., and Weller, D. M. (2018). Differential response of wheat cultivars to *Pseudomonas brassicacearum* and take-all decline soil. *Phytopathology* 108:1363–1372.
- Zhang, C., Lin, Y., Tian, X., Xu, Q., Chen, Z., and Lin, W. (2017). Tobacco bacterial wilt suppression with biochar soil addition associates to improved soil physiochemical properties and increased rhizosphere bacteria abundance. *Appl. Soil Ecol.* 112:90–96.
- Zuo, S., Li, X., Ma, Y., and Yang, S. (2014). Soil microbes are linked to the allelopathic potential of different wheat genotypes. *Plant Soil* 378:49–58.

**Table S1. Analysis of bacterial, archaeal and fungal communities in rhizosphere soil (RS) or root endosphere (RE) of wheats and non-wheat plants.** Primer pairs used are 515F/806R (a), 341F/806R (b), 27F/518R (c), 515F/907R (d), 519F/926R (e), 341F/785R (f), SDBact-0008-a-S-16F/SDBact-0343-a-A-15R (g), (799F/1193R (h), 114F/1392R (i), 8F/533R (j), 27F/1492R (k), 1070F/1492R (l), or 5'-CCTACGGGNGGCWGCAG-3'/5'-GACTACHVGGGTATCTAATCC-3' (m) for bacteria (B), A0349F/A0519R (n), 524F/Arch958modR (o), Arch-amof2/arch-amoar (p), or 519F/958R (q) for archaea (A), and ITS1/ITS2 (r), ITS1/ITS4 (s), ITS3/ITS4 (t), ITS9/ITS4 (u), ITS5/ITS2 (v), or LROR/LR3 (w) for fungi (F). Each condition listed is a particular combination of one soil × one variety × one growth stage, for which the root compartment(s) studied and metabarcoding specifics are indicated. List of references is available in Supplementary data S1.

| Plant host             | Geographic location <sup>2</sup> and soil                         | Plant variety (and phenology)     | Compartment <sup>1</sup> | Microbiota          | Sequencing     | Reference              |
|------------------------|-------------------------------------------------------------------|-----------------------------------|--------------------------|---------------------|----------------|------------------------|
| <b>Wheats</b>          |                                                                   |                                   |                          |                     |                |                        |
| <i>T. aestivum</i>     |                                                                   |                                   |                          |                     |                |                        |
| Condition 1            | Bawburgh (UK), grassland soil (Luvisol)                           | Paragon (heading/flowering stage) | RS and RE                | B (a), F (q)        | Illumina MiSeq | Tkacz et al. 2020      |
| Condition 2            | Bawburgh (UK), crop soil (Luvisol)                                | Paragon (heading stage)           | RS and RE                | B (b), A (n)        | Illumina MiSeq | Prudence et al. 2021   |
| Condition 3            | Pullman (WS), crop soil (Argixerolls)                             | Madsen (ripening stage)           | RS                       | B (c)               | Illumina MiSeq | Mahoney et al. 2017    |
| Condition 4            | Pullman (WS), crop soil (Argixerolls)                             | PI561725 (ripening stage)         | RS                       | B (c)               | Illumina MiSeq | Mahoney et al. 2017    |
| Condition 5            | Kirkville (MO), clay (Hapludalfs) mixed with sterile potting soil | GSTR 11562 (heading stage)        | RE                       | F (r)               | Pyrosequencing | Bokati et al. 2016     |
| Condition 6            | Norwich (UK), crop soil (not described)                           | Paragon (not specified)           | RS                       | B (c)               | Pyrosequencing | Turner et al. 2013     |
| Condition 7            | Northern China, crop soils (Cambisols, Luvisols, Calcisols)       | Not specified (filling stage)     | RS                       | B (a)               | Illumina MiSeq | Fan et al. 2018        |
| Condition 8            | Hangzhou (China), paddy soil (not described)                      | Not specified (seedling stage)    | RS                       | F (not specified)   | Illumina HiSeq | Lu et al. 2018         |
| Condition 9            | Napier (South Africa), crop soil (not described)                  | SST88 (not specified)             | RS                       | F (r)               | Illumina MiSeq | Gqozo et al. 2020      |
| Condition 10           | Pretoria (South Africa), crop soil (not described)                | Kariega (not specified)           | RS                       | F (r)               | Illumina MiSeq | Gqozo et al. 2020      |
| Condition 11           | Bethlehem (South Africa), crop soil (not described)               | Eland (not specified)             | RS                       | F (r)               | Illumina MiSeq | Gqozo et al. 2020      |
| <i>T. durum</i>        |                                                                   |                                   |                          |                     |                |                        |
| Condition 1            | Bawburgh (UK), grassland soil (Luvisol)                           | ENT392 (heading/flowering stage)  | RS and RE                | B (d), A (n), F (t) | Illumina MiSeq | Tkacz et al. 2020      |
| <i>T. dicoccoides</i>  |                                                                   |                                   |                          |                     |                |                        |
| Condition 1            | Bawburgh (UK), grassland soil (Luvisol)                           | Biensur (heading/flowering stage) | RS and RE                | B (d), A (n), F (t) | Illumina MiSeq | Tkacz et al. 2020      |
| <i>A. tauschii</i>     |                                                                   |                                   |                          |                     |                |                        |
| Condition 1            | Bawburgh (UK), grassland soil (Luvisol)                           | DIC70 (heading/flowering stage)   | RS and RE                | B (d), A (n), F (t) | Illumina MiSeq | Tkacz et al. 2020      |
| <b>Barley</b>          |                                                                   |                                   |                          |                     |                |                        |
| <i>Hordeum vulgare</i> |                                                                   |                                   |                          |                     |                |                        |
| Condition 1            | Golm (Germany), sandy experimental soil (not described)           | HID369 (not specified)            | RS                       | B (a)               | Pyrosequencing | Bulgarelli et al. 2015 |
| Condition 2            | Scheyern (Germany), sandy crop soil (Cambisol)                    | Alexis (booting stage)            | RE                       | B (g)               | Illumina MiSeq | Yang et al. 2017       |



|                           |                                                                       |                                 |           |                     |                     |                             |
|---------------------------|-----------------------------------------------------------------------|---------------------------------|-----------|---------------------|---------------------|-----------------------------|
| Condition 3               | Albany (CA), silty loam crop soil (Cambisol)                          | Ethiopian (pre-flowering stage) | RE        | B (f)               | Illumina MiSeq      | Naylor et al. 2017          |
| <b>Oat</b>                |                                                                       |                                 |           |                     |                     |                             |
| <i>Avena strigosa</i>     |                                                                       |                                 |           |                     |                     |                             |
| Condition 1               | Norwich (UK), crop soil (not described)                               | S75 (heading stage)             | RS        | B (not specified)   | Metatranscriptomics | Turner et al. 2013          |
| <i>Avena sativa</i>       |                                                                       |                                 |           |                     |                     |                             |
| Condition 2               | Albany (NY), silty loam crop soil (Cambisol)                          | Monico (pre-flowering stage)    | RE        | B (f)               | Illumina MiSeq      | Naylor et al. 2017          |
| <b>Millet</b>             |                                                                       |                                 |           |                     |                     |                             |
| <i>Pennisetum glaucum</i> |                                                                       |                                 |           |                     |                     |                             |
| Condition 1               | Bambey (Senegal), sandy crop soil (Arenosol)                          | L118 (vegetative stage)         | RS        | B (a)               | Ion torrent         | Ndour et al. 2017           |
| Condition 2               | Bambey (Senegal), sandy crop soil (Arenosol)                          | L14 (vegetative stage)          | RS        | B (a)               | Ion torrent         | Ndour et al. 2017           |
| <i>Serattia italica</i>   |                                                                       |                                 |           |                     |                     |                             |
| Condition 1               | Changzhi (China), sandy clay loam natural soil (not described)        | Changnong35 (flowering stage)   | RS        | B (a)               | Illumina MiSeq      | Han et al. 2017             |
| Condition 2               | Changzhi (China), sandy clay loam natural soil (not described)        | Jingu21 (flowering stage)       | RS        | B (a)               | Illumina MiSeq      | Han et al. 2017             |
| <b>Sorghum</b>            |                                                                       |                                 |           |                     |                     |                             |
| <i>Sorghum bicolor</i>    |                                                                       |                                 |           |                     |                     |                             |
| Condition 1               | Albany (NY), silty loam crop soil (Cambisol)                          | Atx642 (pre-flowering stage)    | RE        | B (f)               | Illumina MiSeq      | Naylor et al. 2017          |
| Condition 2               | Albany (NY), silty loam crop soil (Cambisol)                          | BTx623 (pre-flowering stage)    | RE        | B (f)               | Illumina MiSeq      | Naylor et al. 2017          |
| <b>Maize</b>              |                                                                       |                                 |           |                     |                     |                             |
| <i>Zea mays</i>           |                                                                       |                                 |           |                     |                     |                             |
| Condition 1               | Champaign (IL), fine-silty crop soil (Endoaquoll)                     | 34B43 (post-emergence stage)    | RS        | B (e)               | Pyrosequencing      | Li et al. 2014              |
| Condition 2               | Lansing (NY), silt loam crop soil (Endoaquepts)                       | B73 (flowering stage)           | RS        | B (a)               | Pyrosequencing      | Peiffer et al. 2013         |
| Condition 3               | Champaign (IL), fine-silty crop soil (Endoaquoll)                     | 34B43 (heading stage)           | RS        | A (o)               | Pyrosequencing      | Nelson et al. 2010          |
| Condition 4               | Davis (CA), nutrient-depleted crop soil (Xerorthents or Haploxeralfs) | 3382 (stem extension stage)     | RS        | B (a)               | Illumina MiSeq      | Brisson et al. 2019         |
| Condition 5               | Albany (NY), silty loam crop soil (Cambisol)                          | M017 (pre-flowering stage)      | RE        | B (f), A (c), F (u) | Illumina MiSeq      | Naylor et al. 2017          |
| <b>Rice</b>               |                                                                       |                                 |           |                     |                     |                             |
| <i>Oryza sativa</i>       |                                                                       |                                 |           |                     |                     |                             |
| Condition 1               | Davis (CA), crop soil (not described)                                 | M206 (vegetative stage)         | RS and RE | B (a), F (r)        | Illumina MiSeq      | Santos-Medellin et al. 2017 |

|                             |                                                                       |                                 |           |                     |                |                             |
|-----------------------------|-----------------------------------------------------------------------|---------------------------------|-----------|---------------------|----------------|-----------------------------|
| Condition 2                 | Davis (CA), crop soil (not described)                                 | M104 (vegetative stage)         | RS and RE | B (a)               | Illumina MiSeq | Edwards et al. 2015         |
| <b>Tobacco</b>              |                                                                       |                                 |           |                     |                |                             |
| <i>Nicotinia tabacum</i>    |                                                                       |                                 |           |                     |                |                             |
| Condition 1                 | Nanping (China), crop soil (not described)                            | K326 (ripening stage)           | RS        | B (j)               | Pyrosequencing | Zhang et al. 2017           |
| <i>Nicotiana attenuata</i>  |                                                                       |                                 |           |                     |                |                             |
| Condition 2                 | Great Basin Desert (UT), crop soil (Petrocalcids)                     | Watson (flowering stage)        | RE        | B (a)               | Pyrosequencing | Santhanam et al. 2014       |
| <b>Tomato</b>               |                                                                       |                                 |           |                     |                |                             |
| <i>Solanum lycopersicum</i> |                                                                       |                                 |           |                     |                |                             |
| Condition 1                 | Yecheon (South Korea), greenhouse soil (not described)                | Alexander (ripening stage)      | RS and RE | B (h), A (p), F (t) | Illumina MiSeq | Lee et al. 2019             |
| Condition 2                 | Busan (Korea), silt loam crop soil (not described)                    | MoneyMaker (flowering stage)    | RS        | B (c)               | Illumina MiSeq | Kwak et al. 2018            |
| Condition 3                 | Busan (Korea), silt loam crop soil (not described)                    | Hawaii 7996 (flowering stage)   | RS        | B (c)               | Illumina MiSeq | Kwak et al. 2018            |
| Condition 4                 | Barka (Oman), sandy crop soil (not described)                         | Not specified (not specified)   | RS        | F (s)               | Pyrosequencing | Kazerooni et al. 2017       |
| <b>Bean</b>                 |                                                                       |                                 |           |                     |                |                             |
| <i>Phaseolus vulgaris</i>   |                                                                       |                                 |           |                     |                |                             |
| Condition 1                 | Othello (WS), crop soil (not described)                               | Eclipse (flowering stage)       | RS        | B (a), A (a), F (r) | Illumina MiSeq | Stopnisek and Shade 2021    |
| Condition 2                 | El Carmen de Viboral (Colombia), crop soil (not described)            | G14947 (V4 pre-flowering stage) | RS        | B (m)               | Illumina MiSeq | Perez-Jaramillo et al. 2017 |
| Condition 3                 | El Carmen de Viboral (Colombia), crop soil (not described)            | Not specified (flowering stage) | RS        | B (m)               | Illumina MiSeq | Perez-Jaramillo et al. 2017 |
| <b>Soybean</b>              |                                                                       |                                 |           |                     |                |                             |
| <i>Glycine max</i>          |                                                                       |                                 |           |                     |                |                             |
| Condition 1                 | Knoxville (TN), crop soil (Paleudults)                                | Williams (flowering stage)      | RS        | B (f)               | Illumina MiSeq | Liu et al. 2019             |
| Condition 2                 | Villages in Buenos Aires Region (Argentina), pampa soils (Hapludolls) | Williams 82 (not specified)     | RS and RE | B (a)               | Pyrosequencing | Rascovan et al. 2016        |
| Condition 3                 | Kyoto (Japan), crop soil (not described)                              | Fukujishi (flowering stage)     | RS        | B (c)               | Pyrosequencing | Sugiyama et al. 2014        |
| Condition 4                 | Changchun (China), crop soil (not described)                          | Heilong48 (ripening stage)      | RS        | F (s)               | Pyrosequencing | Bai et al. 2015             |
| Condition 5                 | Jiaxiang (China), crop soil (not described)                           | Shannong 20 (flowering stage)   | RS        | F (v)               | Illumina MiSeq | Han et al. 2017             |
| <b>Arabidopsis</b>          |                                                                       |                                 |           |                     |                |                             |
| <i>Arabidopsis thaliana</i> |                                                                       |                                 |           |                     |                |                             |
| Condition 1                 | Benton Harbor (MI), natural soil (not described)                      | Pna-10 (bolting stage)          | RS        | B (c)               | Pyrosequencing | Chaparro et al. 2014        |
| Condition 2                 | Chapel Hill (NC), crop soil mixed with sterile soil (not described)   | Col-0 (flowering stage)         | RS and RE | B (i)               | Pyrosequencing | Lundberg et al. 2012        |

|             |                                                   |                                    |           |       |                |                        |
|-------------|---------------------------------------------------|------------------------------------|-----------|-------|----------------|------------------------|
| Condition 3 | Cologne (Germany), crop loam soil (not described) | Landsberg erecta (flowering stage) | RS and RE | B (k) | Pyrosequencing | Bulgarelli et al. 2012 |
| Condition 4 | Cologne (Germany), crop loam soil (not described) | Shakdara (flowering stage)         | RS and RE | B (h) | Pyrosequencing | Bulgarelli et al. 2012 |

---

**Poplar**

*Populus deltoides*

|             |                                                              |                              |           |              |                |                    |
|-------------|--------------------------------------------------------------|------------------------------|-----------|--------------|----------------|--------------------|
| Condition 1 | Buffalo Valley (TN), sandy loam natural soil (not described) | Native ecotype (mature tree) | RS and RE | B (a), F (w) | Pyrosequencing | Gottel et al. 2013 |
| Condition 2 | Smith County (TN), natural soils (not described)             | Not specified (mature tree)  | RS and RE | B (l), F (w) | Pyrosequencing | Shakya et al. 2013 |

---

<sup>1</sup> For all studies on the root endosphere compartment, roots were surface-sterilized before macerating root tissues.

<sup>2</sup> Abbreviations were used to designate United Kingdom (UK), Washington State (WS), Missouri (MO), New-York State (NY), Illinois (IL), Michigan (MI), California (CA), Utah (UT), Tennessee (TN), and North Carolina (NC).

**Table S2.** Molecular tools available for direct analysis of root-associated microbial functional groups. Asterisks indicate studies that used the primers in the case of wheat. List of references is available in Supplementary data S1.

| Microbial function         | Gene marker  | Method  | Primers (and amplicon size) | Primer reference             | Examples of studies where method was used        |
|----------------------------|--------------|---------|-----------------------------|------------------------------|--------------------------------------------------|
| <b>Biotic interactions</b> |              |         |                             |                              |                                                  |
| DAPG synthesis             | <i>phlD</i>  |         | Phl2a/Phl2q (127 bp)        | Paulin <i>et al.</i> 2009    |                                                  |
|                            |              | qPCR    | B2BF/B2BR3 (319 bp)         | Almario <i>et al.</i> 2013   | Hu <i>et al.</i> 2016                            |
|                            |              |         | PhlD_65F_DEG/PhlD_236R_DEG  | Imperiali <i>et al.</i> 2017 | Dennert <i>et al.</i> 2018                       |
|                            |              | qRT-PCR | Phl2a/Phl2q (127 bp)        | Paulin <i>et al.</i> 2009    |                                                  |
|                            |              |         | phlD-fwd/phlD-rev (58 bp)   | DeCoste <i>et al.</i> 2011   | Gadkar and Filion 2013                           |
| Hydrogen cyanide synthesis | <i>hcnAB</i> | PCR     | PM2/PM726R (570 bp)         | Svercel <i>et al.</i> 2007   |                                                  |
|                            | <i>hcnBC</i> | qPCR    | HCNn/Acb (233 bp)           | Paulin <i>et al.</i> 2009    |                                                  |
|                            |              | qRT-PCR | HCNn/Acb (233 bp)           | Paulin <i>et al.</i> 2009    |                                                  |
|                            | <i>hcnC</i>  | qRT-PCR | hcnC-fwd/hcnC-rev (60 bp)   | DeCoste <i>et al.</i> 2011   | Novinscak et Filion 2011; Gadkar and Filion 2013 |
| Phenazine synthesis        | <i>phzF</i>  | qPCR    | PhzF_2Fm/PhzF_2Rm           | Imperiali <i>et al.</i> 2017 | Dennert <i>et al.</i> 2018                       |
| ACC deaminase activity     | <i>acdS</i>  | qPCR    | acdSF5/acdSR8 (133 bp)      | Bouffaud <i>et al.</i> 2018* | Renoud <i>et al.</i> 2020                        |
|                            |              | qRT-PCR | acdSF5/acdSR8 (133 bp)      | Bouffaud <i>et al.</i> 2018* | Renoud <i>et al.</i> 2020                        |

|                              |                          |                        |                                        |                              |                                                        |
|------------------------------|--------------------------|------------------------|----------------------------------------|------------------------------|--------------------------------------------------------|
|                              |                          | Illumina MiSeq         | acdSF5/acdSR8 (133 bp)                 | Bouffaud <i>et al.</i> 2018* | Renoud <i>et al.</i> 2020                              |
| <b>Biogeochemical cycles</b> |                          |                        |                                        |                              |                                                        |
| N <sub>2</sub> fixation      | <i>nifH</i>              | PCR                    | polF/polR (360 bp)                     | Poly <i>et al.</i> 2001      | Wartiainen <i>et al.</i> 2008                          |
|                              |                          | qPCR                   | polF/polR (360 bp)                     |                              | Bouffaud <i>et al.</i> 2016; Renoud <i>et al.</i> 2020 |
|                              |                          | RT-PCR                 | nifH-g1-forB/ nifH-g1-rev (371 bp)     | Bürgmann <i>et al.</i> 2003  |                                                        |
|                              |                          | qPCR                   | nifH-g1-forB/ nifH-g1-rev (371 bp)     |                              | Rilling <i>et al.</i> 2018*                            |
|                              |                          | qRT-PCR                | polF/polR (360 bp)                     |                              | Bouffaud <i>et al.</i> 2016                            |
|                              |                          | Illumina MiSeq         | polF/polR (360 bp)                     |                              | Renoud <i>et al.</i> 2020                              |
|                              |                          | DNA cloning-sequencing | polF/polR (360 bp)                     |                              | Soni <i>et al.</i> 2016                                |
| Nitrification                | Archaeal<br><i>amoA</i>  | qPCR, qRT-PCR          | <i>amo196F/amo277R</i>                 | Treusch <i>et al.</i> 2005   | Leininger <i>et al.</i> 2006                           |
|                              |                          | qPCR                   | CrenamoA1-165f/CrenamoA1-309r (226 bp) | Offre <i>et al.</i> 2009     |                                                        |
|                              |                          | qPCR                   | CrenamoA2-165f/CrenamoA2-390r (226 bp) | Offre <i>et al.</i> 2009     |                                                        |
|                              |                          | DNA cloning-sequencing | <i>amoA19F/amoA643R</i>                | Treusch <i>et al.</i> 2005   | Leininger <i>et al.</i> 2006                           |
|                              | Bacterial<br><i>amoA</i> | PCR                    | <i>amoA-1F/amoA-2R</i> (491 bp)        | Rotthauwe <i>et al.</i> 1997 |                                                        |
|                              |                          | qPCR                   | <i>amoA-1F/amoA-2R</i> (491 bp)        |                              | Leininger <i>et al.</i> 2006; Offre <i>et al.</i> 2009 |
| Denitrification              | <i>nirK</i> ,            | PCR                    | nirK876/nirK1040 (165 bp)              | Henry <i>et al.</i> 2004     |                                                        |
|                              |                          | qRT-PCR                | nirK876/nirK1040 (165 bp)              |                              | Achouak <i>et al.</i> 2019*                            |

|                              |               |                        |                                                |                                           |                               |
|------------------------------|---------------|------------------------|------------------------------------------------|-------------------------------------------|-------------------------------|
|                              | <i>nirS</i>   | PCR                    | nirSCd3Af/nirSR3cd                             | Throbäck <i>et al.</i> 2004               |                               |
|                              |               | qRT-PCR                | nirSCd3Af/nirSR3cd                             |                                           | Achouak <i>et al.</i> 2019*   |
|                              | <i>nosZI</i>  | qPCR                   | nosZ1F/nosZIR (259 bp)                         | Henry <i>et al.</i> 2006                  | Spor <i>et al.</i> 2020*      |
|                              |               | qPCR                   | nosZ1F/nosZIR (259 bp)                         | Henry <i>et al.</i> 2006                  | Spor <i>et al.</i> 2020*      |
|                              | <i>nosZII</i> | qPCR                   | noZ2F/nos2R (267 bp)                           | Henry <i>et al.</i> 2006                  | Spor <i>et al.</i> 2020*      |
|                              |               | qPCR                   | noZ2F/nos2R (267 bp)                           | Henry <i>et al.</i> 2006                  | Spor <i>et al.</i> 2020*      |
| Phosphorus<br>mineralization | <i>phoD</i>   | PCR                    | ALPS-F730/ALPS-R1101 (371 bp)                  | Sakurai <i>et al.</i> 2008                | Wu <i>et al.</i> 2009         |
|                              |               | qPCR                   | ALPS-F730/ALPS-R1101 (371 bp)                  |                                           | Wan <i>et al.</i> 2020        |
|                              |               | Illumina MiSeq         | <i>phoD</i> -FW/ <i>phoD</i> -RW (208 bp)      | Bergkemper <i>et al.</i> 2016             |                               |
|                              |               | Illumina MiSeq         | <i>phoD</i> -F733/ <i>phoD</i> -R1083 (350 bp) | Ragot <i>et al.</i> 2015                  | Long <i>et al.</i> 2018       |
|                              |               | qPCR                   | <i>phoD</i> -F733/ <i>phoD</i> -R1083 (350 bp) |                                           | Chen <i>et al.</i> 2017       |
|                              |               | <i>phoN</i>            | Illumina MiSeq                                 | <i>phoN</i> -FW/ <i>phoN</i> -RW (159 bp) | Bergkemper <i>et al.</i> 2016 |
|                              |               | qPCR                   | <i>phoN</i> -FW/ <i>phoN</i> -RW (159 bp)      |                                           | Spohn <i>et al.</i> 2018      |
|                              | <i>appA</i>   | Illumina MiSeq         | <i>appA</i> -FW/ <i>appA</i> -RW (375 bp)      | Bergkemper <i>et al.</i> 2016             |                               |
|                              | <i>phnX</i>   | Illumina MiSeq         | <i>phnX</i> -FW/ <i>phnX</i> -RW (147 bp)      | Bergkemper <i>et al.</i> 2016             |                               |
| Phosphorus<br>solubilization | <i>Gcd</i>    | Illumina MiSeq         | <i>gcd</i> -FW/ <i>gcd</i> -RW (330 bp)        | Bergkemper <i>et al.</i> 2016             | Li <i>et al.</i> 2017         |
|                              | <i>pqqC</i>   | DNA cloning-sequencing | PqqCr1/pqqCf1 (546 bp)                         | Meyer <i>et al.</i> 2010                  |                               |

---
